# Supplementary material for: Effective dose to adult patients from 338 radiopharmaceuticals estimated using ICRP biokinetic data, ICRP/ICRU computational reference phantoms and ICRP 2007 tissue weighting factors
Source: PubMed Central journal article supplement (PMC4545621; doi:10.1186/2197-7364-1-9), 2014-09-29

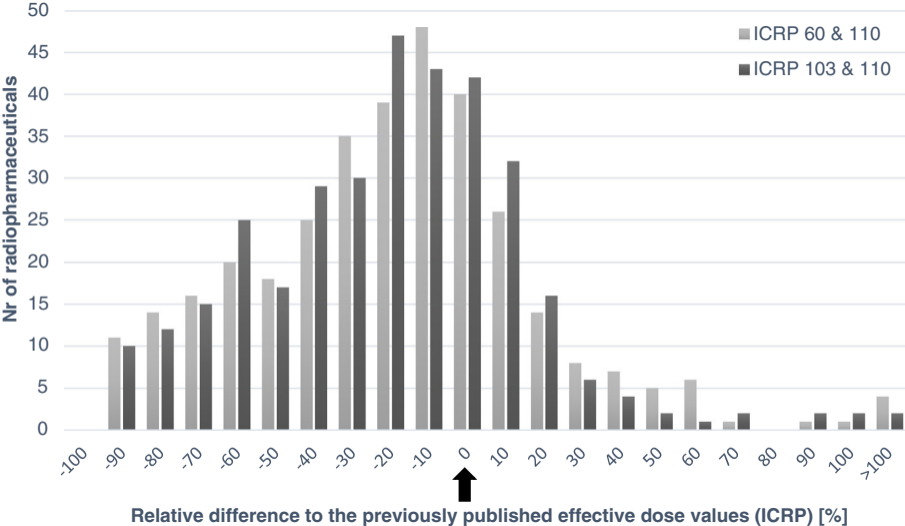

Supplement: 40658_2014_116_MOESM2_ESM.pdf [file 40658_2014_116_MOESM2_ESM.pdf]
